# Supplementary material for: NKp30+ NK cells are associated with HBV control during pegylated-interferon-alpha-2b therapy of chronic hepatitis B
Source: PubMed Central journal article supplement (PMC5150634; doi:10.1038/srep38778), 2016-12-12
Supplement: srep38778-s1.pdf [file srep38778-s1.pdf]

# **NKp30<sup>+</sup> NK cells are associated with HBV control during pegylated-interferon-alpha-2b therapy of chronic hepatitis B**

Xiaokun Shen, Binqing Fu, Yanyan Liu, Chuang Guo, Ying Ye, Rui Sun, Jiabin Li, Zhigang Tian, Haiming Wei

## **Inventory of Supplementary Information**

**Supplementary Figure 1.** Schematic overview of selected patients.

**Supplementary Figure 2.** The gating strategy for NK cells and treatment with ADV had no impact on the total number of NK cells.

**Supplementary Figure 3.** The levels of NKp44, NKp46, Tim-3 and PD-1 expression on NK cells were not significantly different between the SR and NR patients during therapy.

**Supplementary Figure 4.** Comparison of markers of NCRs, cytotoxicity and activation during Peg-IFN- $\alpha$  monotherapy compared with Peg-IFN- $\alpha$  plus ADV combination therapy.

**Supplementary Figure 5.** CD215 (IL-15R) expression on different immune cell subsets in Responders and Non-Responders.

**Supplementary Figure 6.** Impact of differing therapies on the clinical parameters.

**Supplementary Table 1.** Response at the end of follow-up

**Supplementary Table 2.** Antibodies used for flow cytometry

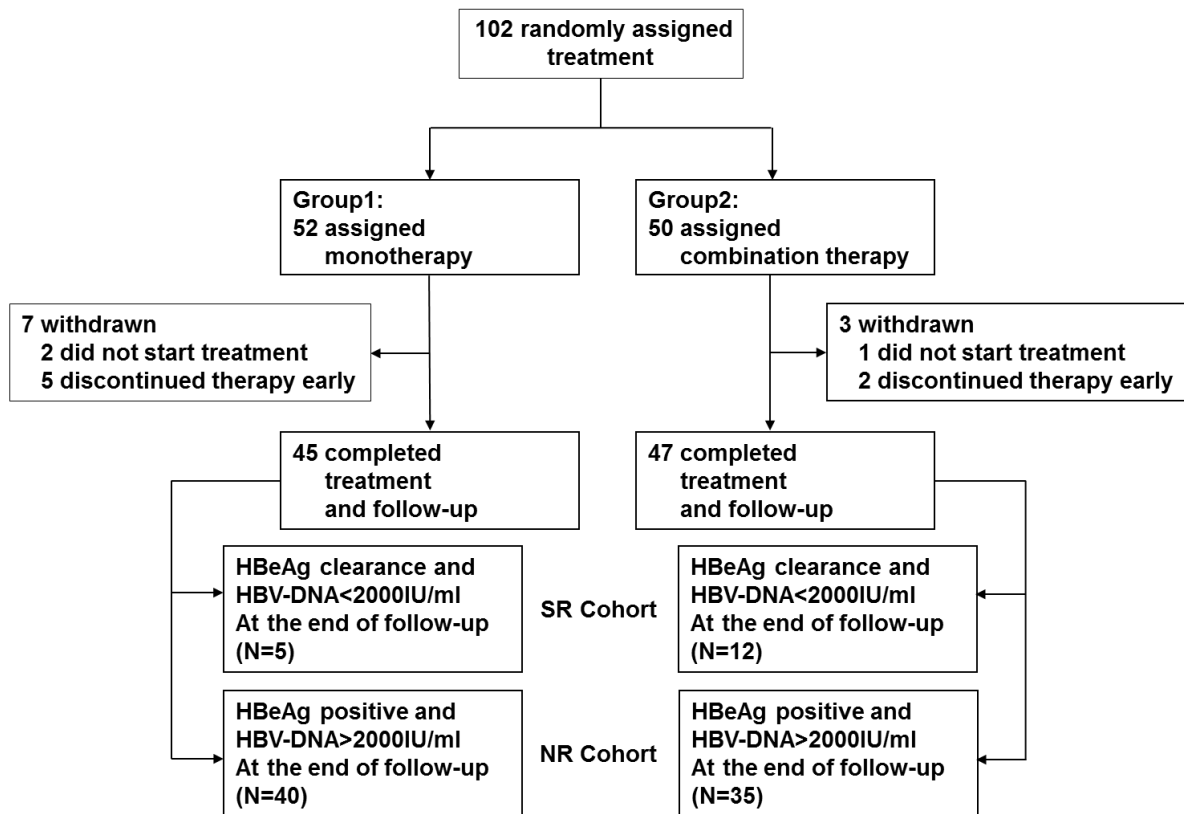

**Supplementary Figure 1.** Schematic overview of selected patients.

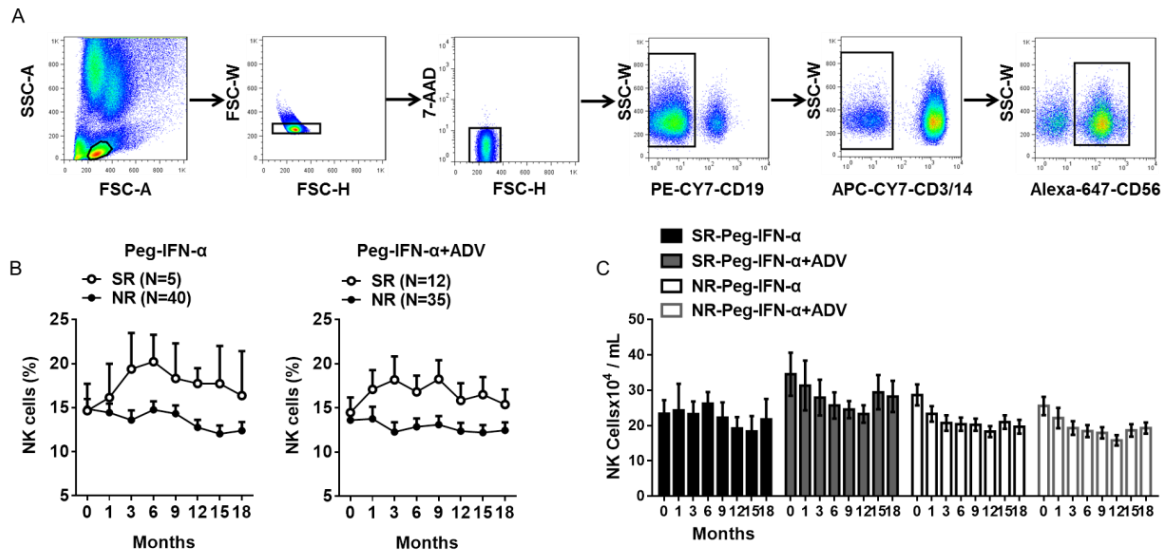

**Supplementary Figure 2.** The gating strategy for NK cells and treatment with ADV had no impact on the total number of NK cells. **(A)** Lymphocytes were identified by forward and side scatter, and single cells were identified. Next, dead cells (7-AAD), B cells (CD19), monocytes (CD14) and T cells (CD3) were excluded, and NK cells were defined as CD56<sup>+</sup>. **(B)** The percentage of NK cells in the two treatment groups during the 12 months of therapy and 6 months of follow-up. **(C)** Absolute numbers of NK cells in the two treatment groups during the 12 months of therapy and 6 months of follow-up.

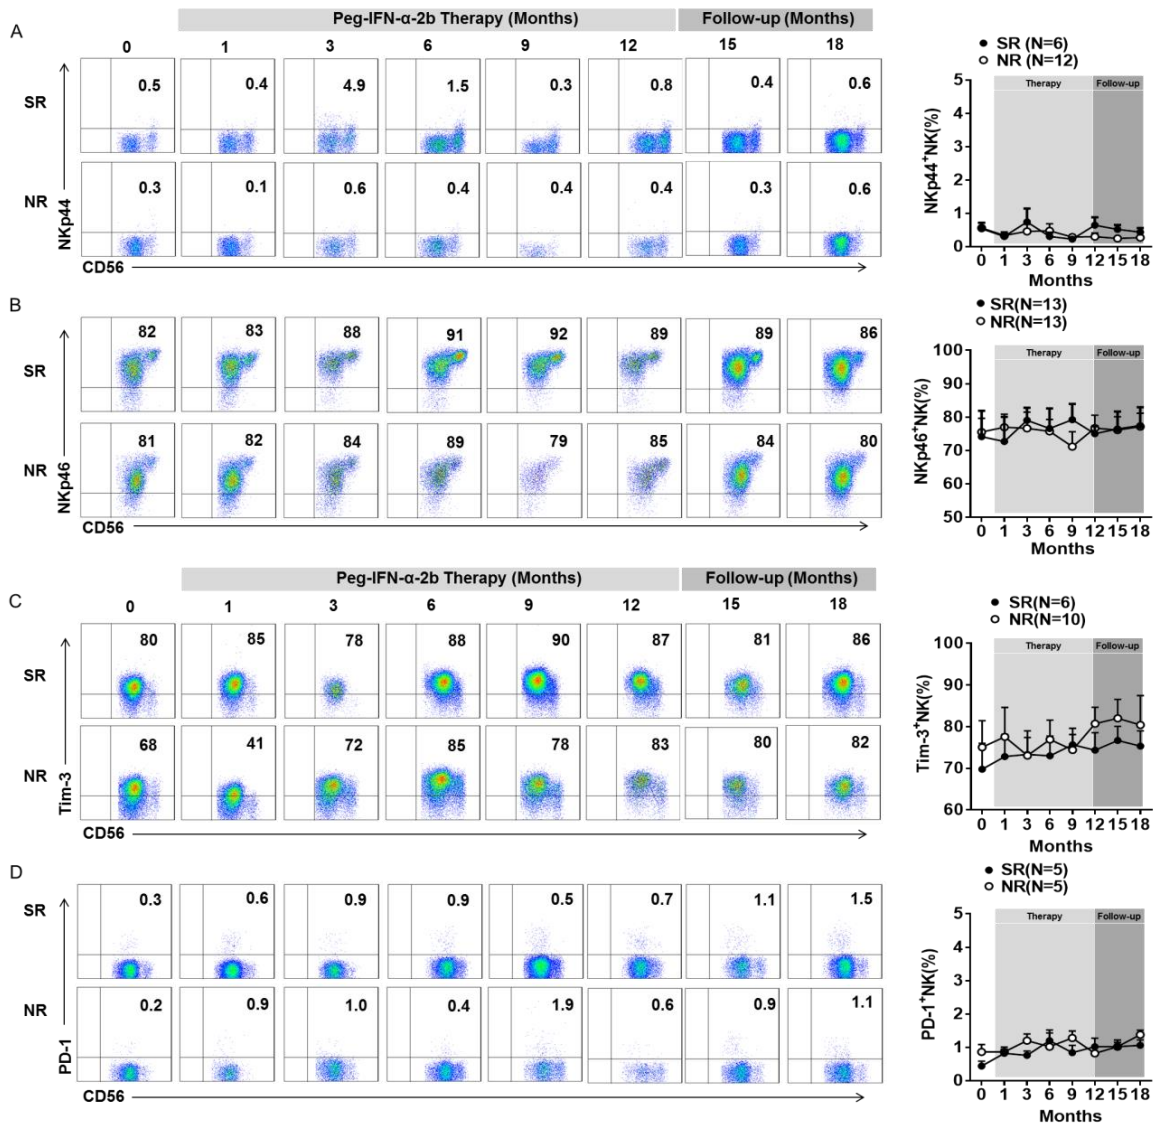

**Supplementary Figure 3.** The levels of NKp44, NKp46, Tim-3 and PD-1 expression on NK cells were not significantly different between the SR and NR patients during therapy. **(A, B)** A longitudinal analysis of the expression of NKp44 and NKp46 in paired samples from the SR and NR patients. **(C, D)** A longitudinal analysis of the expression of Tim-3 and PD-1 in paired samples from the SR and NR patients.

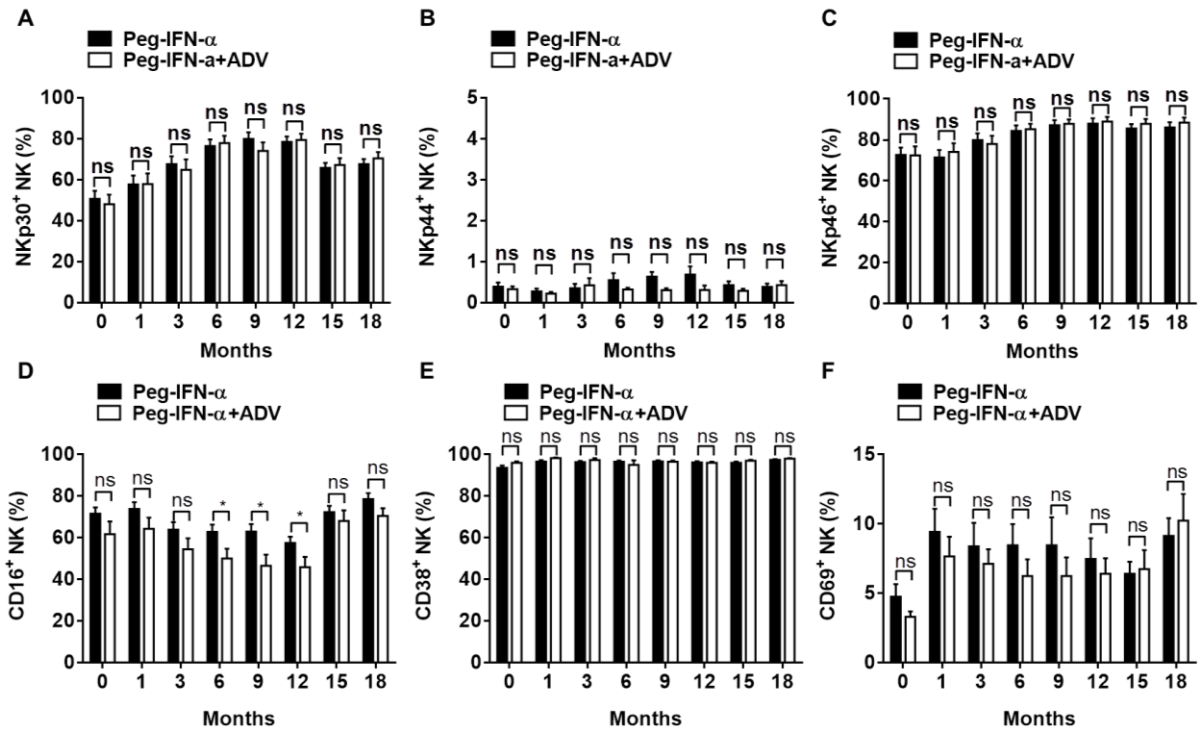

**Supplementary Figure 4.** Comparison of markers of NCRs, cytotoxicity and activation during Peg-IFN- $\alpha$  monotherapy compared with Peg-IFN- $\alpha$  plus ADV combination therapy. Percentage of: **(A)** NKp30<sup>+</sup>, **(B)** NKp44<sup>+</sup>, **(C)** NKp46<sup>+</sup>, **(D)** CD16<sup>+</sup>, **(E)** CD38<sup>+</sup>, and **(F)** CD69<sup>+</sup> NK cells from patients in each treatment cohort. The results are expressed as the mean  $\pm$  SEM. Significant changes are marked with asterisks, \* $p < 0.05$ .

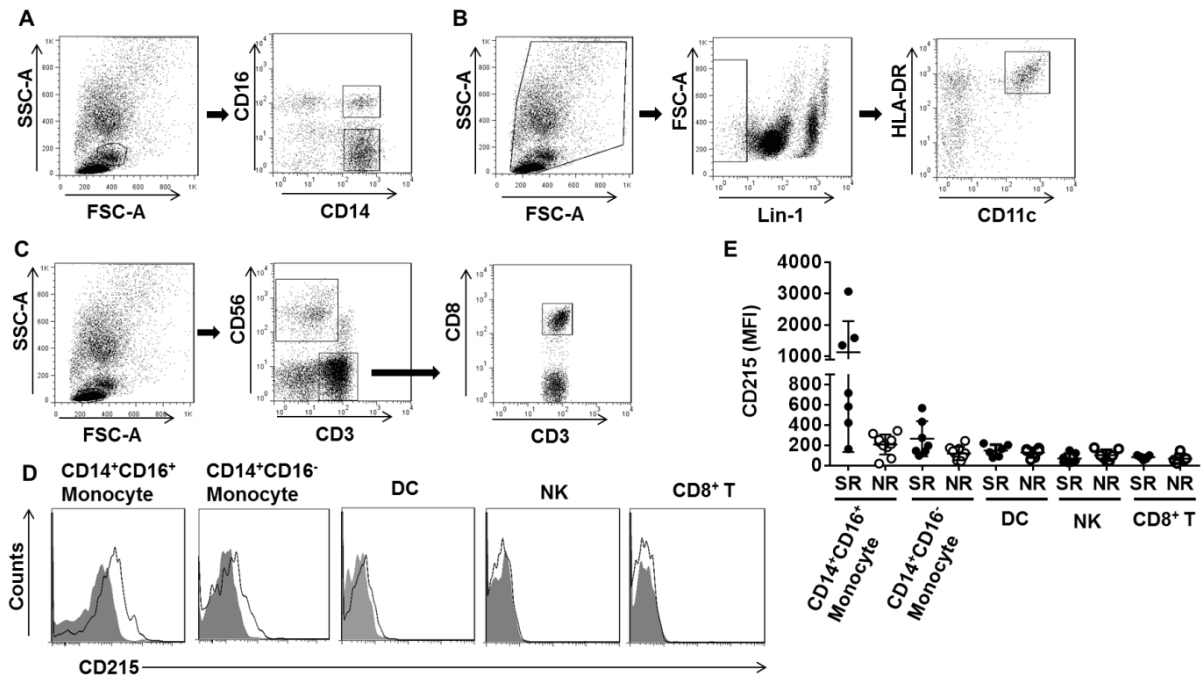

**Supplementary Figure 5.** CD215 (IL-15R) expression on different immune cell subsets in Responders and Non-Responders. **(A)** The gating strategy of pro-inflammatory CD14<sup>+</sup> CD16<sup>+</sup> monocytes and classical CD14<sup>+</sup> CD16<sup>-</sup> monocytes. **(B)** The gating strategy of myeloid dendritic cells. **(C)** The gating strategy of NK cells and CD8<sup>+</sup> T cells. **(D)** Representative FACS analysis of CD215 (IL-15R $\alpha$ ) surface expression on the different immune cell subsets, including monocytes, myeloid dendritic cells, NK cells, and CD8<sup>+</sup> T lymphocytes. **(E)** Mean fluorescence intensity (MFI) of IL-15R $\alpha$  (CD215) expression on different immune cell subsets from the SR (black) and NR (white) patients.

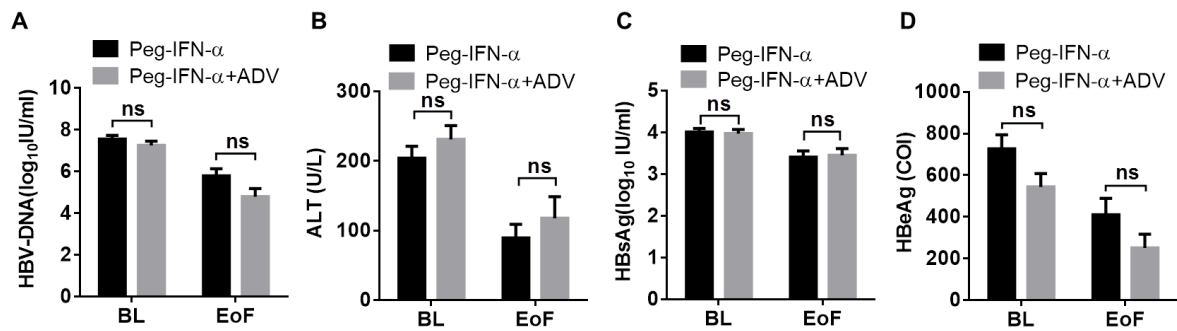

**Supplementary Figure 6.** Impact of differing therapies on the clinical parameters. Change in (A) HBV-DNA loads ( $\log_{10}$  IU/ml), (B) ALT levels (U/L), (C) HBsAg titres ( $\log_{10}$  IU/ml) and (D) HBeAg levels (COI) in the Peg-IFN- $\alpha$  monotherapy cohort compared with the Peg-IFN- $\alpha$  plus ADV combination therapy cohort. BL, baseline; EoF, end of follow-up.

**Supplementary Table 1. Response at the end of follow-up**

| <b>Treatment Response</b>       | <b>Group of treatment</b> | <b>No. of Patients</b> | <b>% of Patients</b> | <b><i>p</i> Value</b> |
|---------------------------------|---------------------------|------------------------|----------------------|-----------------------|
| HBeAg seroconversion*           | PEG-IFN- $\alpha$ -2b     | 12/45                  | 26.7%                | 0.442                 |
|                                 | PEG-IFN $\alpha$ -2b+ADV  | 16/47                  | 34%                  |                       |
| Sustained response <sup>#</sup> | PEG-IFN- $\alpha$ -2b     | 5/45                   | 11.1%                | 0.075                 |
|                                 | PEG-IFN $\alpha$ -2b+ADV  | 12/47                  | 25.5%                |                       |

\* HBeAg loss and seroconversion to anti-HBe.

<sup>#</sup> HBeAg seroconversion, ALT normalisation and serum HBV DNA < 2000 IU/ml.



**Supplementary Table 2. Antibodies used for flow cytometry**

| <b>Specificity</b>      | <b>Fluorochrome</b> | <b>Company</b> |
|-------------------------|---------------------|----------------|
| CD3                     | APC-CY7             | BD Biosciences |
| CD56                    | Alexa-647           | BD Biosciences |
| CD56                    | Alexa-488           | BD Biosciences |
| NKp30                   | PE                  | BD Biosciences |
| NKp30                   | Alexa-647           | BD Biosciences |
| NKp46                   | PE                  | BD Biosciences |
| NKp44                   | PE                  | BD Biosciences |
| Ki-67                   | Alexa-647           | BD Biosciences |
| IFN- $\gamma$           | FITC                | BD Biosciences |
| CD107a                  | PE                  | BD Biosciences |
| CD62L                   | FITC                | BD Biosciences |
| PD-1                    | PE                  | BD Biosciences |
| NKG2A                   | PE                  | R&D Systems    |
| TIM-3                   | PE                  | R&D Systems    |
| CD14                    | APC-CY7             | BD Biosciences |
| CD19                    | PE-CY7              | BD Biosciences |
| 7-AAD                   | PE-CY5              | BD Biosciences |
| CD215                   | PE                  | Biolegend      |
| Mouse IgG1 Iso Control  | FITC                | BD Biosciences |
| Mouse IgG1 Iso Control  | PE                  | BD Biosciences |
| Mouse IgG2a Iso Control | PE                  | BD Biosciences |
| Mouse IgG1 Iso Control  | Alexa-647           | BD Biosciences |
| Mouse IgG1 Iso Control  | PE-CY7              | BD Biosciences |
| Mouse IgG1 Iso Control  | APC-Cy7             | BD Biosciences |
| Mouse IgG2b Iso Control | APC-Cy7             | BD Biosciences |
